# Supplementary material
Source: Springer Nature journal article supplement (https://www.springermedizin.de/resource/supplementary/12891_2007_406_MOESM1_ESM.pdf/9510976)

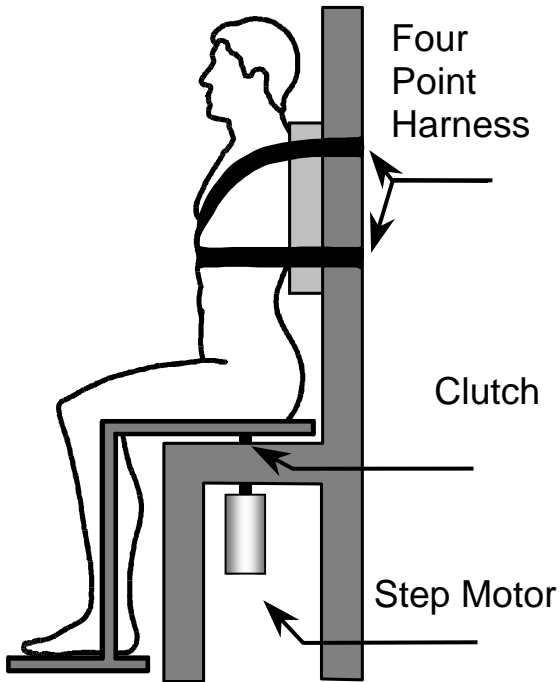

Supplement: MOESM1 [file 9510976]
